# Supplementary material for: A new approach towards zeolitic tetrazolate-imidazolate frameworks (ZTIFs) with uncoordinated N-heteroatom sites for high CO2uptake
Source: Royal Society of Chemistry journal article supplement (doi:10.1039/c4cc05022c), 2014-08-13
Supplement: c4cc05022c1.pdf [file c4cc05022c1.pdf]

## Supporting information

### New Approach towards Zeolitic Tetrazolate-Imidazolate Frameworks (ZTIFs) with Uncoordinated N-heteroatom Sites For high CO<sub>2</sub> Uptake

Fei Wang, Hong-Ru Fu, Yao Kang and Jian Zhang\*

State Key Laboratory of Structural Chemistry, Fujian Institute of Research on the Structure of Matter, the Chinese Academy of Sciences, Fuzhou, Fujian 350002, P. R. China. E-mail:

zhj@fjirsm.ac.cn.

#### Materials and general procedures.

All of the chemicals are commercial available, and used without further purification. Elemental analyses of C and H were performed with an EA1110 CHNS-0 CE elemental analyzer. The IR (KBr pellet) spectra were recorded (400-4000 cm<sup>-1</sup> region) on a Nicolet Magna 750 FT-IR spectrometer. Thermogravimetric analyses (TGA) were carried out in an air atmosphere with a heating rate of 10 °C/min on a STA449C integration thermal analyzer. Powder X-ray diffraction (PXRD) data were collected on a Rigaku MultiFlex diffractometer using Cu K $\alpha$  radiation. <sup>1</sup>H NMR experiments were carried out on a Bruker spectrometer operating at resonance frequencies of 400 MHz. Inductively Coupled Plasma OES (ICP-OES) was performed on ULTIMA 2 ICP OES Spectrometer (Jobin Yvon, France). The N<sub>2</sub> adsorption isotherms were recorded by using a micromeritics ASAP 2020 surface area and porosity analyzer. The structure of **ZTIFs** were solved by direct methods and refined on  $F^2$  by full-matrix, least-squares methods using the SHELXL-97 program package.

**Synthesis of Zn(5-mtz)(2-eim) $\cdot$ x(guest) (**ZTIF-1**):** The mixture of Zn(CH<sub>3</sub>CO<sub>2</sub>)<sub>2</sub> $\cdot$ 2(H<sub>2</sub>O) (0.5 mmol, 0.110 g), 5-methyltetrazole (5-mtz, 0.5 mmol, 0.043 g), 2-ethylimidazole (2-eim, 0.5 mmol, 0.48 g) in DMF (2 ml) and ethanol (2ml) was sealed in a 20 ml vial and heated to 120 °C for 3 days, and then cooled to room-temperature. The yellow polyhedral crystals were obtained, washed with ethanol, and dried at room temperature (Yield: 50%). The micro-synthesis condition of **ZTIF-1** can be scalable to 1 gram scale by using the same reaction conditions in a larger volume (50 mL Teflon-lined stainless steel reactor). The co-existence of 5-mtz and 2-eim in **ZTIF-1** are proved by <sup>1</sup>H NMR. To prove the phase purity of the bulk sample, the powder-XRD (PXRD) and elemental analysis (EA) of the activated samples are presented here. A comparison calculated/found EA of the activated samples proved the phase purity of the sample. The ratio of these two ligands has been obtained from the EA results.

**Elemental analysis (activated)** C<sub>7</sub>H<sub>10</sub>N<sub>6</sub>Zn: Calcd. C, 34.71; H, 4.16; N, 34.71; Zn, 26.41. Found C, 27.78; H, 4.43; N, 28.02; Zn, 21.48.

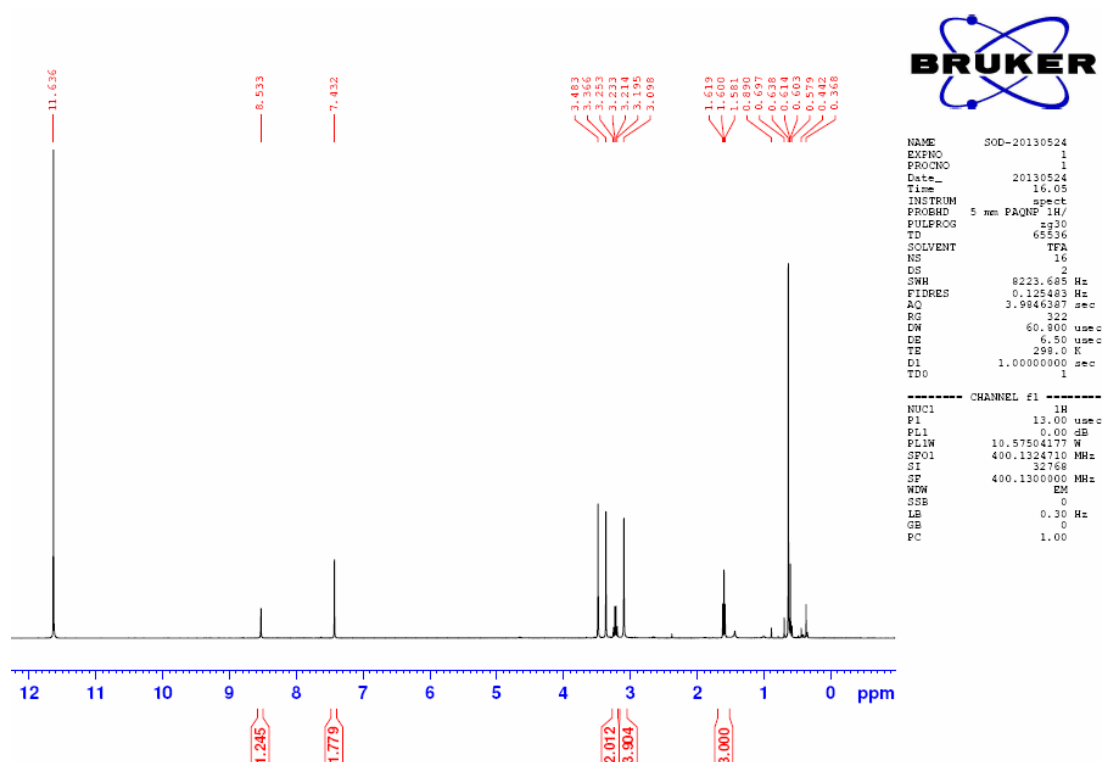

Figure s1. The  $^1\text{H}$ NMR spectra of **ZTIF-1** in  $\text{CF}_3\text{COOD}$  solvent.

**Synthesis of  $\text{Zn}(\text{5-mtz})(\text{2-pim}) \cdot \text{x}(\text{guest})$  (**ZTIF-2**):** ZTIF-2 was obtained by the similar method as described for ZTIF-1 except for using 2-propylimidazole (2-pim) instead of 2-eim (Yield: 48%). The micro-synthesis condition of **ZTIF-2** can also be scalable to 1 gram scale by using the same reaction conditions in a larger volume (50 mL Teflon-lined stainless steel reactor). The co-existence of 5-mtz and 2-pim in **ZTIF-1** are proved by  $^1\text{H}$  NMR. To prove the phase purity of the bulk sample, the powder-XRD (PXRD) and elemental analysis (EA) of the activated samples are presented here. A comparison calculated/found EA of the activated samples proved the phase purity of the sample.

**Elemental analysis (activated)**  $\text{C}_8\text{H}_{12}\text{N}_6\text{Zn}$ : Calcd. C, 37.49; H, 4.72; N, 32.81; Zn, 24.97. Found C, 37.14; H, 4.9; N, 32.7; Zn, 24.25.

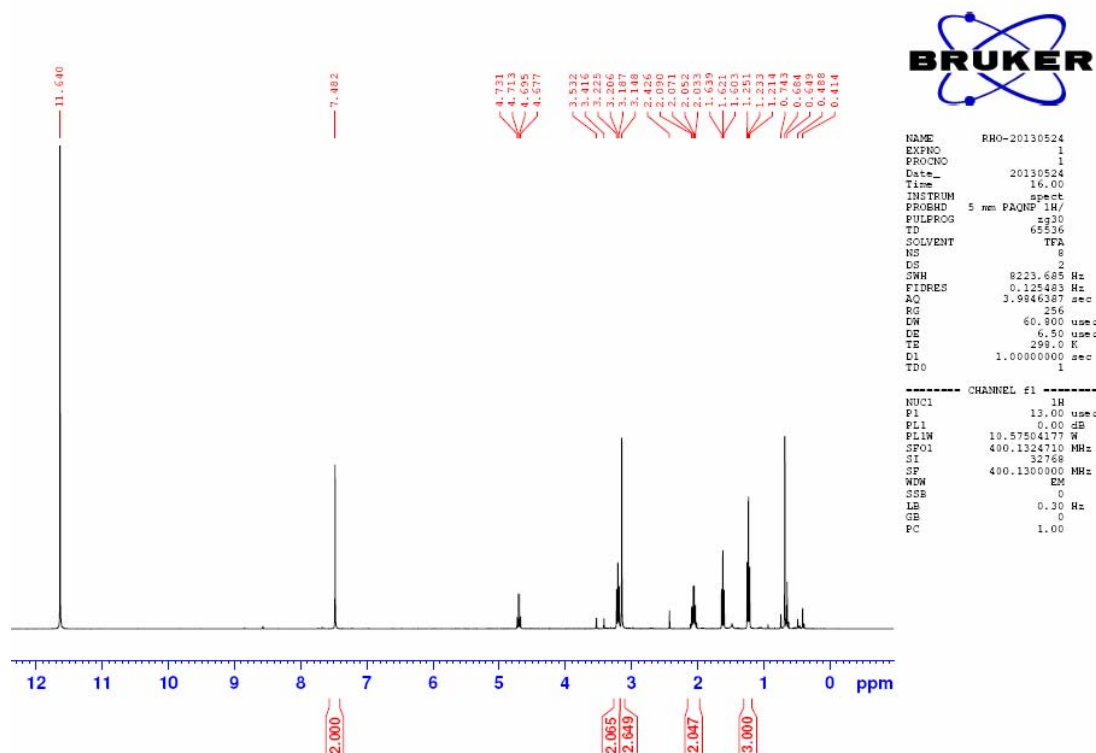

Figure s2. The  $^1\text{H}$ NMR spectra of **ZTIF-2** in  $\text{CF}_3\text{COOD}$  solvent.

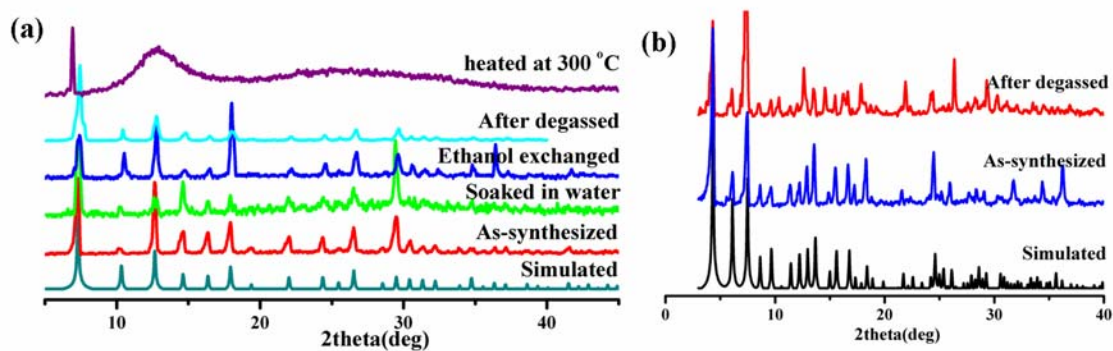

Figure s3. The Powder XRD patterns of **ZTIF-1** (a) and **ZTIF-2** (b).

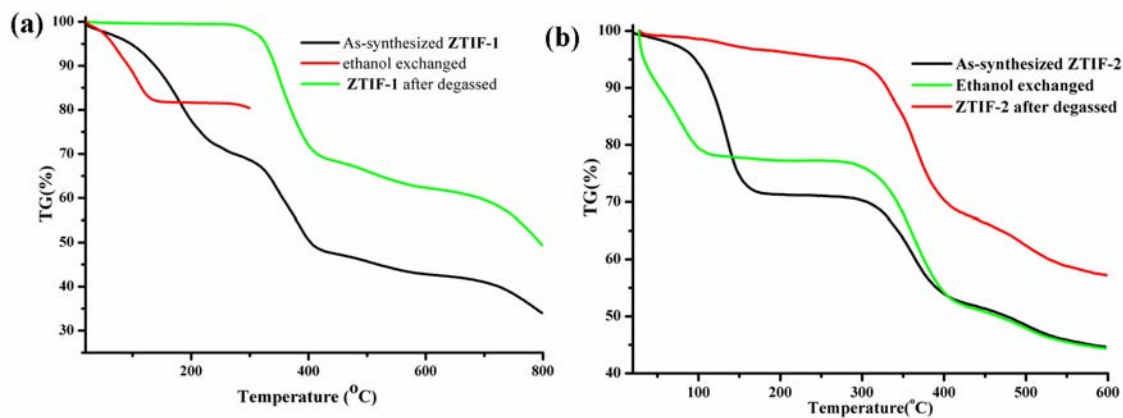

Figure s4. The TG plots of **ZTIF-1** (a) and **ZTIF-2** (b).

The TGA traces of the as-synthesized **ZTIF-1** and **2** samples and the samples after being immersed in dry ethanol solvents at ambient temperature for three days are shown in Figure s4, showing effective solvent-exchange. In particular, in the TGA trace of ethanol-exchanged samples of **ZTIF-1**, the initial gradual weight-loss step of 31.5% till 300 °C were replaced by a small initial step (17.6% of weight loss) at 135 °C temperature, a plateau to ca. 290 °C and a sharp weight loss from that point onwards indicates the decomposition of the material. The TGA trace of ethanol-exchanged samples after degassed shows that the samples were fully activated. Similarly, for **ZTIF-2**, the initial gradual weight-loss step of 28.1% till 170 °C were replaced by a small initial step (21.0% of weight loss) at 100 °C temperature, a plateau to ca. 290 °C and a sharp weight loss from that point onwards indicates the decomposition of the material.

### Isosteric heat of gas adsorption

The gas sorption data for **1** measured up to 1 bar at different temperatures were fitted by the virial equation (1) to estimate the enthalpy of adsorption.

$$\ln(p) = \ln(n) + 1/T(A_0 + A_1n + A_2n^2 + \dots) + (b_0 + b_1n + b_2n^2 + b_3n^3 + \dots) \quad (1)$$

Where  $P$  is pressure,  $N$  is amount adsorbed,  $T$  is temperature,  $A_0$ ,  $A_1$  and  $A_2 \dots$  and  $b_0$   $b_1$   $b_2 \dots$  are temperature independent empirical parameters.

The isosteric heat of adsorption was estimated from the following equation (2) as a function of CO<sub>2</sub> uptake.

$$Q_{st} = -R(A_0 + A_1n + A_2n^2 + \dots) \quad (2)$$

Here,  $Q_{st}$  is the coverage-dependent isosteric heat of adsorption and  $R$  is the universal gas constant of 8.314 J K<sup>-1</sup> mol<sup>-1</sup>.

Henry's constant ( $K_H$ ) is calculated from where  $T$  is temperature.

$$K(H) = \exp(-b_0) \cdot \exp(-a_0/T) \quad (3)$$

The Henry's Law selectivity ( $S_{ij}$ ) for gas  $i$  over  $j$  at certain temperature is calculated from the following equation (4)

$$S_{ij} = K_{Hi} / K_{Hj} \quad (4)$$

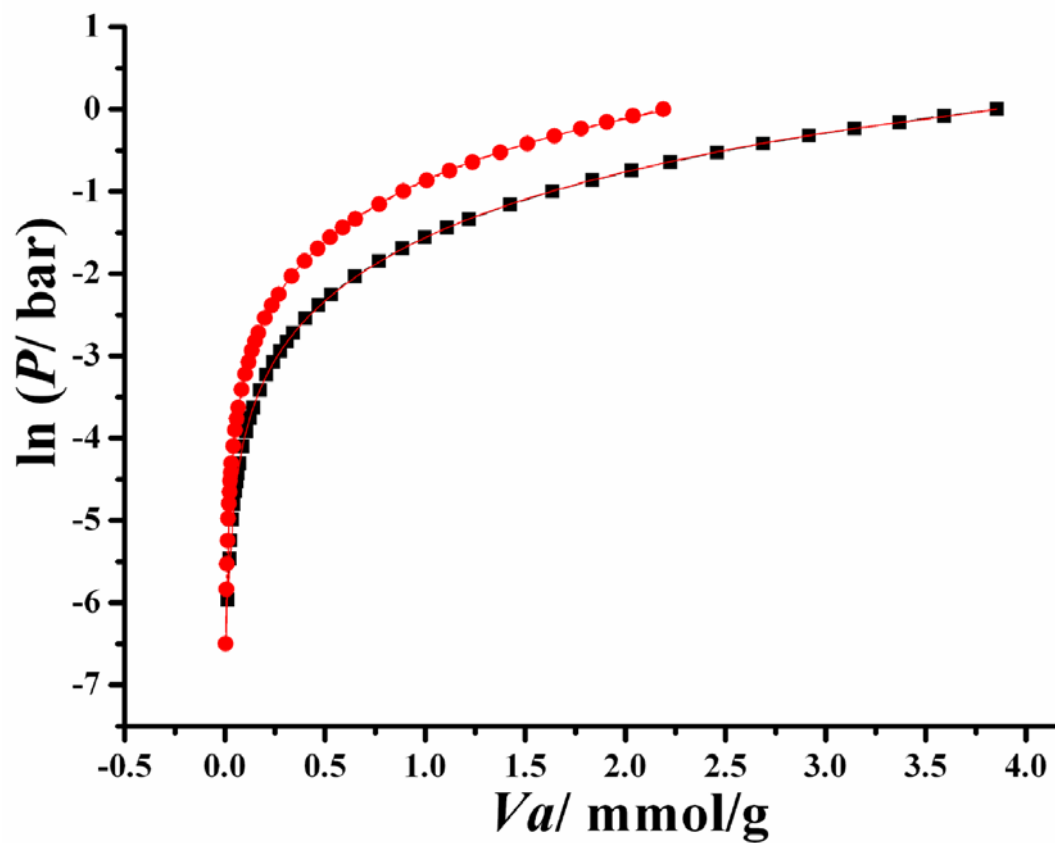

Figure s5. The CO<sub>2</sub> sorption isotherms for ZTIF-1 fitting by virial method.

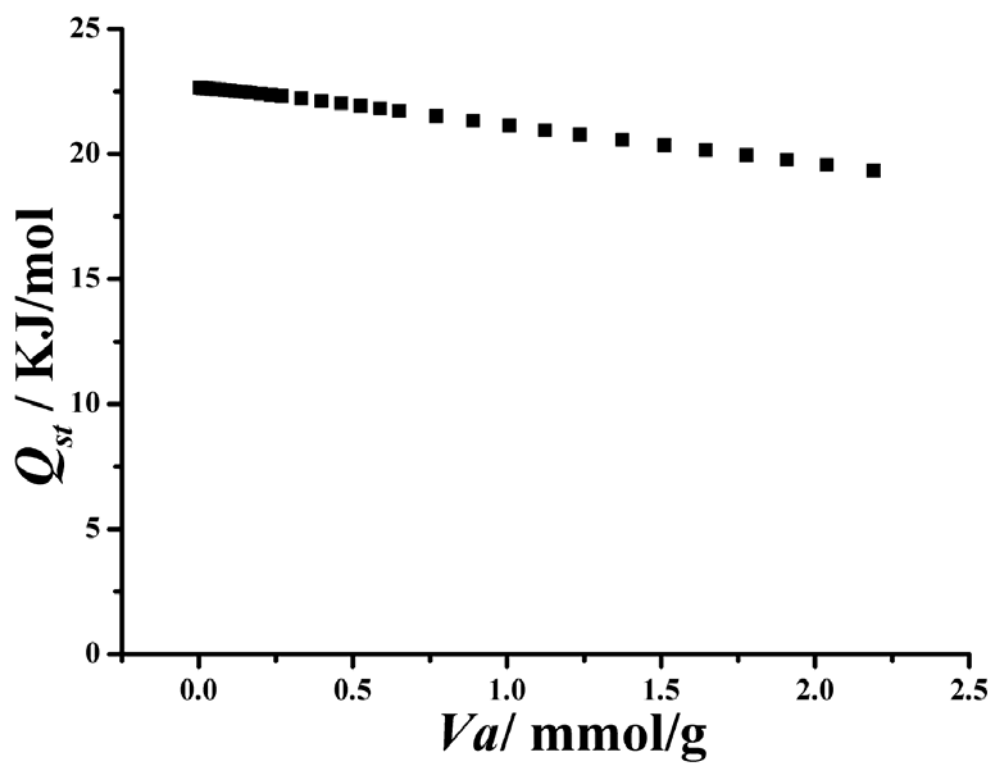

Figure s6. The isosteric heat of CO<sub>2</sub> adsorption for ZTIF-1 estimated by the virial equation.

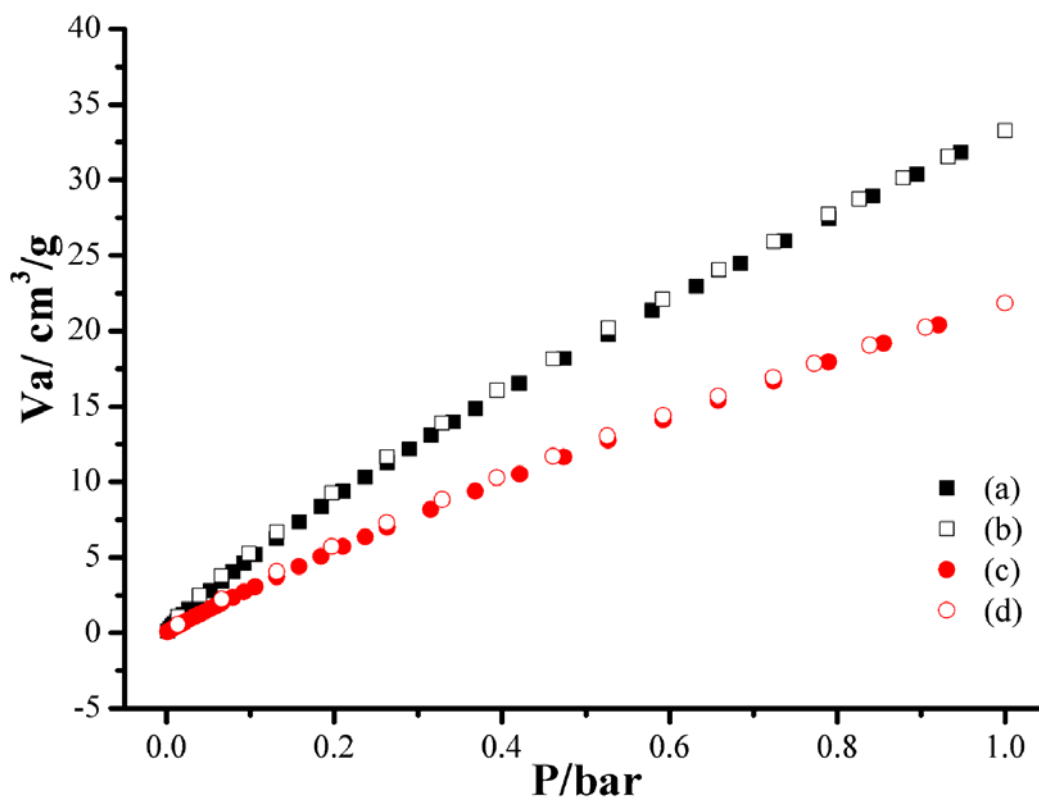

Figure s7. The CO<sub>2</sub> sorption isotherms of ZTIF-2. Adsorption (a) and desorption (b) at 273K; Adsorption (c) and desorption (d) at 295K.

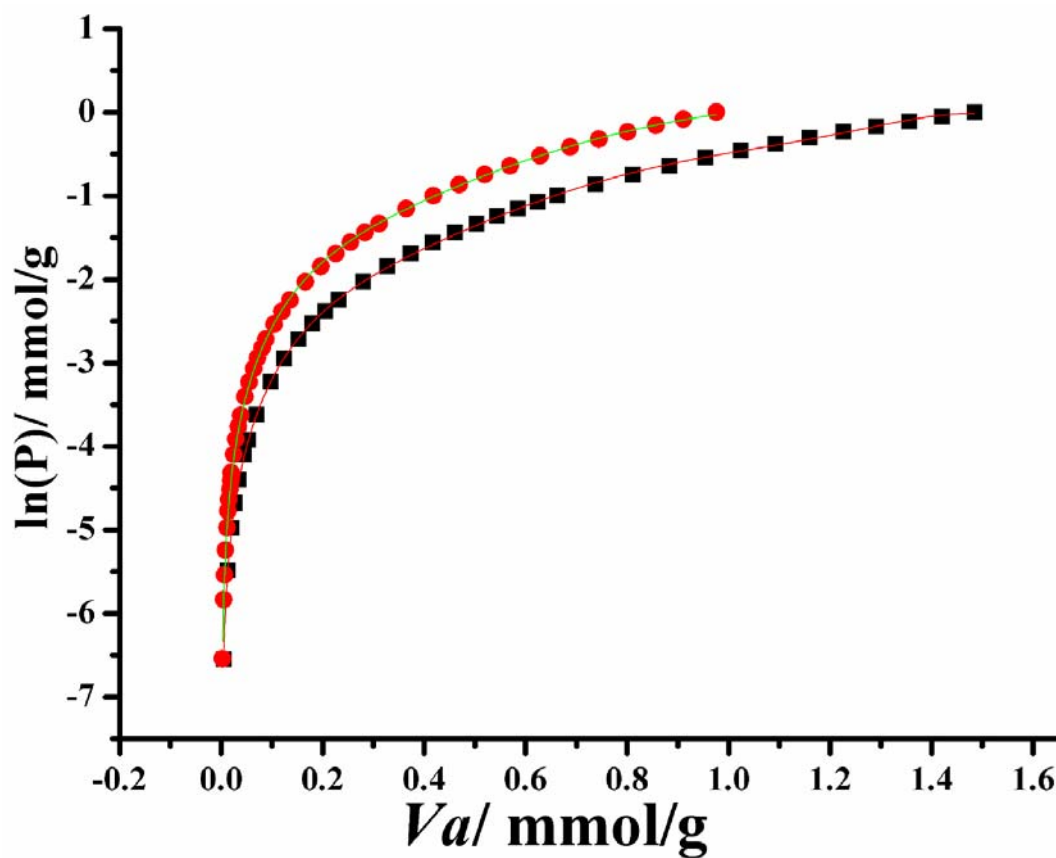

Figure s8. The CO<sub>2</sub> sorption isotherms for ZTIF-2 fitting by virial method.

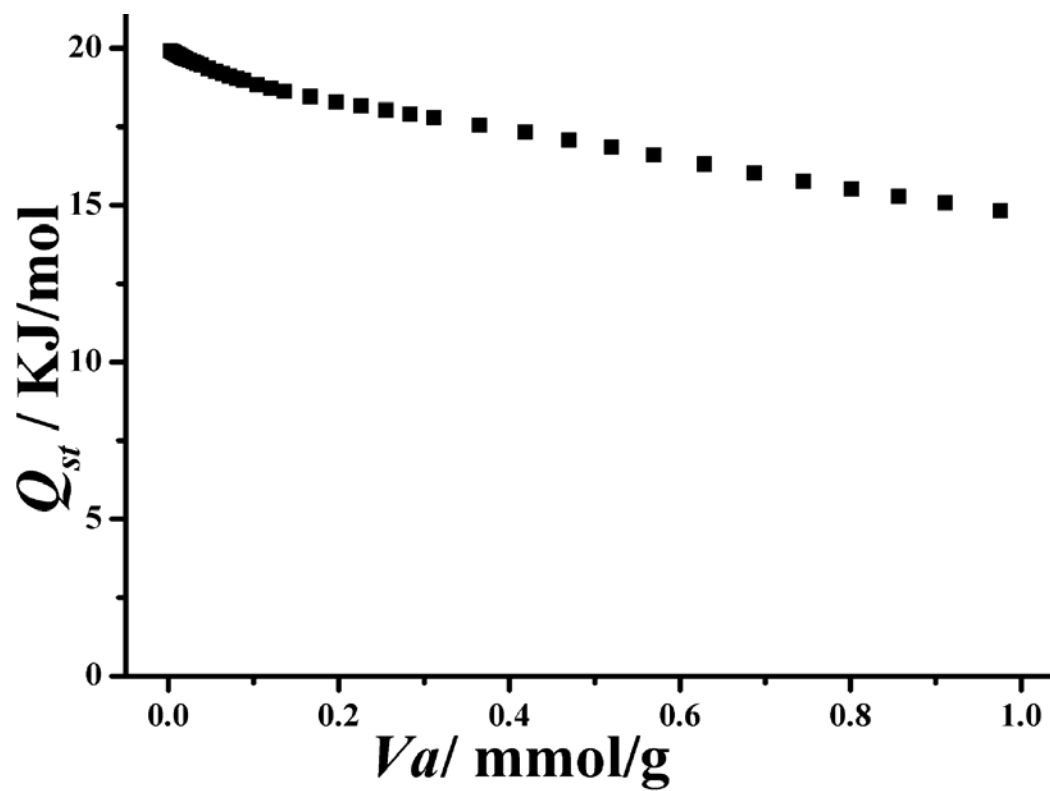

Figure s9. The isosteric heat of CO<sub>2</sub> adsorption for ZTIF-2 estimated by the virial equation.

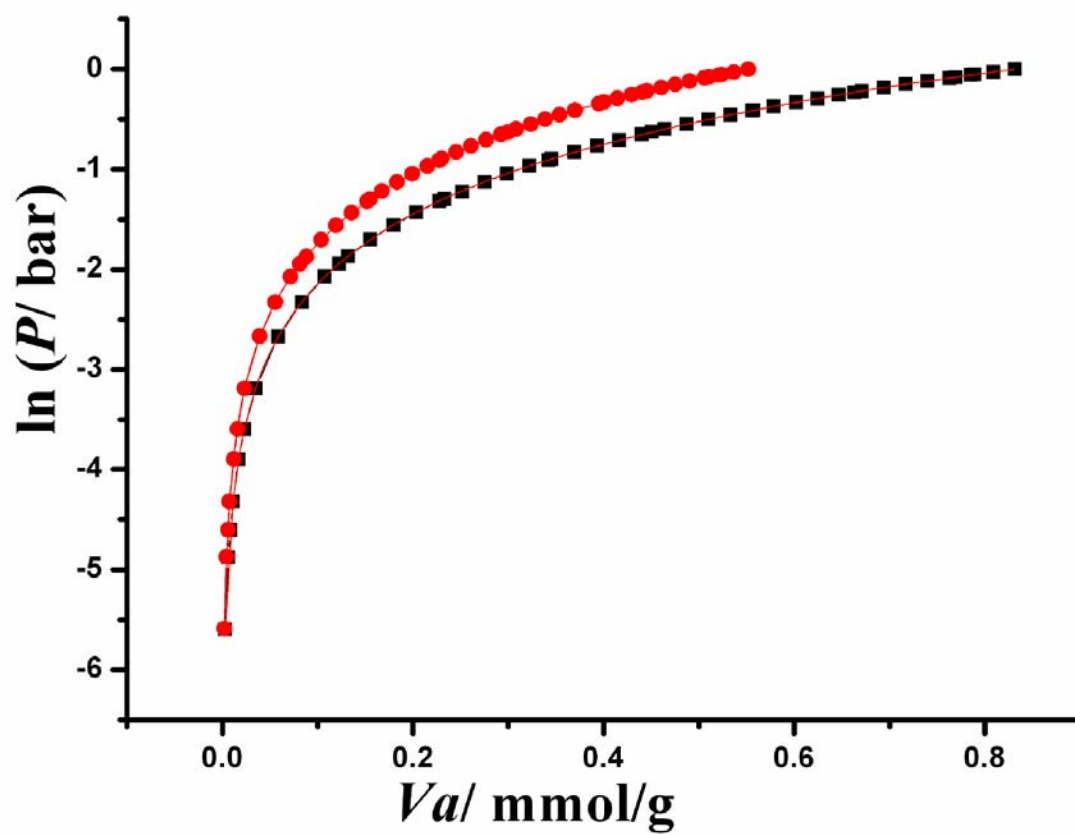

Figure s10. The CH<sub>4</sub> sorption isotherms for ZTIF-1 fitting by virial method.

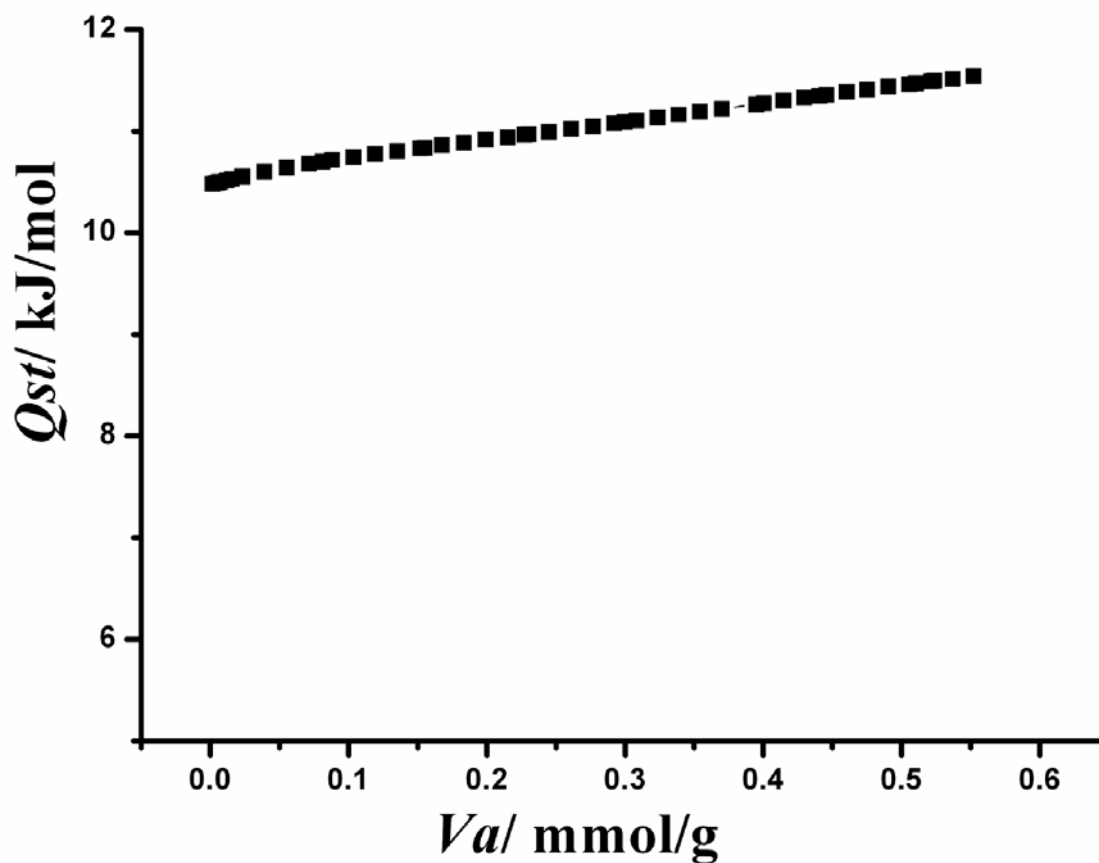

Figure s11. The isosteric heat of CH<sub>4</sub> adsorption for **ZTIF-1** estimated by the virial equation.

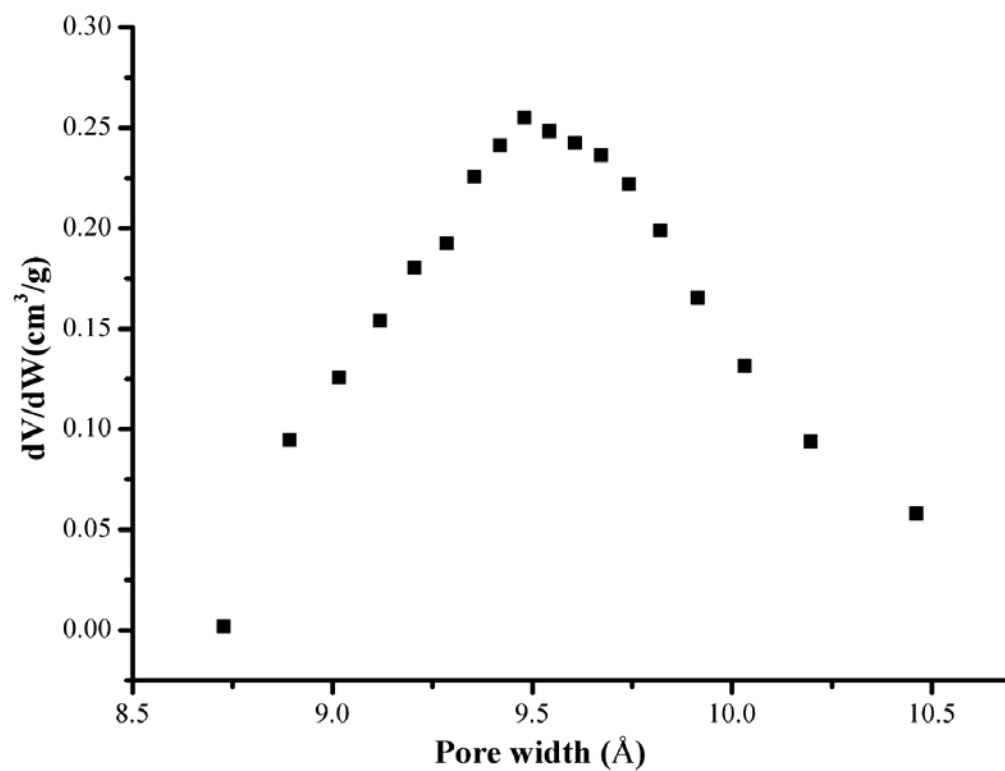

Figure s12. Pore size distribution for **ZTIF-1** by [Horvath-Kawazoe method](#).
